# Supplementary material
Source: HighWire-hosted journal article supplement (https://bmjopen.bmj.com/content/8/3/e019003)
Supplement: inline-supplementary-material-2 [file inline-supplementary-material-2.pdf]

## Appendix 2: STROBE Statement

| Section/topic             | Item no | Recommendation                                                                                                                                                                        | Reported on page no |
|---------------------------|---------|---------------------------------------------------------------------------------------------------------------------------------------------------------------------------------------|---------------------|
| <b>Title</b>              |         |                                                                                                                                                                                       |                     |
| Title                     | 1       | (a) Indicate the study's design with a commonly used term in the title or the abstract.                                                                                               | 1                   |
| <b>Abstract</b>           |         |                                                                                                                                                                                       |                     |
| Structured summary        | 1       | (b) Provide in the abstract an informative and balanced summary of what was done and what was found.                                                                                  | 3-4                 |
| <b>Introduction</b>       |         |                                                                                                                                                                                       |                     |
| Background/rationale      | 2       | Explain the scientific background and rationale for the investigation being reported.                                                                                                 | 6-7                 |
| Objectives                | 3       | State specific objectives, including any prespecified hypotheses.                                                                                                                     | 7                   |
| <b>Methods</b>            |         |                                                                                                                                                                                       |                     |
| Study design              | 4       | Present key elements of study design early in the paper.                                                                                                                              | 8                   |
| Setting                   | 5       | Describe the setting, locations, and relevant dates, including periods of recruitment, exposure, follow-up, and data collection.                                                      | 8-11                |
| Participants              | 6       | (a) Give the eligibility criteria, and the sources and methods of selection of participants.                                                                                          | 8-11                |
| Variables                 | 7       | Clearly define all outcomes, exposures, predictors, potential confounders, and effect modifiers. Give diagnostic criteria, if applicable.                                             | 8-11                |
| Data sources/ measurement | 8*      | For each variable of interest, give sources of data and details of methods of assessment (measurement). Describe comparability of assessment methods if there is more than one group. | 8-11                |
| Bias                      | 9       | Describe any efforts to address potential sources of bias.                                                                                                                            | 8-11                |

|                        |     |                                                                                                                                                                                                                                                                                                                                                                                                                    |       |
|------------------------|-----|--------------------------------------------------------------------------------------------------------------------------------------------------------------------------------------------------------------------------------------------------------------------------------------------------------------------------------------------------------------------------------------------------------------------|-------|
| Study size             | 10  | Explain how the study size was arrived at.                                                                                                                                                                                                                                                                                                                                                                         | 8-11  |
| Quantitative variables | 11  | Explain how quantitative variables were handled in the analyses. If applicable, describe which groupings were chosen and why.                                                                                                                                                                                                                                                                                      | 8-11  |
| Statistical methods    | 12  | (a) Describe all statistical methods, including those used to control for confounding.<br>(b) Describe any methods used to examine subgroups and interactions.<br>(c) Explain how missing data were addressed.<br>(d) If applicable, describe analytical methods taking account of sampling strategy.<br>(e) Describe any sensitivity analyses.                                                                    | 10    |
| <b>Results</b>         |     |                                                                                                                                                                                                                                                                                                                                                                                                                    |       |
| Participants           | 13* | (a) Report numbers of individuals at each stage of study e.g. numbers potentially eligible, examined for eligibility, confirmed eligible, included in the study, completing follow-up, and analysed.<br>(b) Give reasons for non-participation at each stage.<br>(c) Consider use of a flow diagram.                                                                                                               | 12-13 |
| Descriptive data       | 14* | (a) Give characteristics of study participants (e.g. demographic, clinical, social) and information on exposures and potential confounders.<br>(b) Indicate number of participants with missing data for each variable of interest.                                                                                                                                                                                | 12-13 |
| Outcome data           | 15* | Report numbers of outcome events or summary measures.                                                                                                                                                                                                                                                                                                                                                              | 12-19 |
| Main results           | 16  | (a) Give unadjusted estimates and, if applicable, confounder-adjusted estimates and their precision (e.g., 95% confidence interval). Make clear which confounders were adjusted for and why they were included.<br>(b) Report category boundaries when continuous variables were categorized.<br>(c) If relevant, consider translating estimates of relative risk into absolute risk for a meaningful time period. | 12-19 |
| Other analyses         | 17  | Report other analyses done—e.g. analyses of subgroups and interactions, and sensitivity analyses.                                                                                                                                                                                                                                                                                                                  | 12-19 |

|                          |    |                                                                                                                                                                             |       |
|--------------------------|----|-----------------------------------------------------------------------------------------------------------------------------------------------------------------------------|-------|
| <b>Discussion</b>        |    |                                                                                                                                                                             |       |
| Key results              | 18 | Summarise key results with reference to study objectives.                                                                                                                   | 20    |
| Limitations              | 19 | Discuss limitations of the study, taking into account sources of potential bias or imprecision. Discuss both direction and magnitude of any potential bias.                 | 24-25 |
| Interpretation           | 20 | Give a cautious overall interpretation of results considering objectives, limitations, multiplicity of analyses, results from similar studies, and other relevant evidence. | 20-25 |
| Generalisability         | 21 | Discuss the generalisability (external validity) of the study results.                                                                                                      | 20-25 |
| <b>Other information</b> |    |                                                                                                                                                                             |       |
| Funding                  | 22 | Give the source of funding and the role of the funders for the present study and, if applicable, for the original study on which the present article is based.              | 26    |

\*Give information separately for exposed and unexposed groups.
